# Supplementary material for: Delayed Signs and Symptoms of Extended Release Guanfacine Overdose in Two Adolescent Patients: Implications of Monitoring on the Psychiatry Unit
Source: Hindawi journal article supplement (doi:10.1155/2022/2149301), 2022-03-25
Supplement: f1 [file 2149301.f1.pdf]

Supplementary Table 2. Overview of Commonly Encountered Toxicidromes\* \*\*

| Legend                                                                                                                                                                                                                            |                                                                                                                                                                                                                                                                                                                                                                                                                                           |                                                                                                                                                                            |                                                                                      |                                                                                       |                                                                                     |                                                                                                                                                                                |                                                                                     |                                                                                                                                 |                                                                                     |
|-----------------------------------------------------------------------------------------------------------------------------------------------------------------------------------------------------------------------------------|-------------------------------------------------------------------------------------------------------------------------------------------------------------------------------------------------------------------------------------------------------------------------------------------------------------------------------------------------------------------------------------------------------------------------------------------|----------------------------------------------------------------------------------------------------------------------------------------------------------------------------|--------------------------------------------------------------------------------------|---------------------------------------------------------------------------------------|-------------------------------------------------------------------------------------|--------------------------------------------------------------------------------------------------------------------------------------------------------------------------------|-------------------------------------------------------------------------------------|---------------------------------------------------------------------------------------------------------------------------------|-------------------------------------------------------------------------------------|
|                                                                                                                                                  |                                                                                                                                                                                                                                                                                                                                                          |                                                                                           |     |     |  |                                                                                             |  |                                              |  |
| HR                                                                                                                                                                                                                                | BP                                                                                                                                                                                                                                                                                                                                                                                                                                        | ECG changes                                                                                                                                                                | RR                                                                                   | ↑temp                                                                                 | ↓temp                                                                               | Hyper-active bowel sounds                                                                                                                                                      | Agitation                                                                           | Confused                                                                                                                        | Lethargic/somnolent                                                                 |
| Class/Medication                                                                                                                                                                                                                  | Common overdose symptoms                                                                                                                                                                                                                                                                                                                                                                                                                  | Common Signs, Symptoms, and Monitoring Parameters                                                                                                                          |                                                                                      |                                                                                       |                                                                                     |                                                                                                                                                                                |                                                                                     | Notes on monitoring duration                                                                                                    |                                                                                     |
|                                                                                                                                                                                                                                   |                                                                                                                                                                                                                                                                                                                                                                                                                                           | HR/BP                                                                                                                                                                      | RR                                                                                   | Temp                                                                                  | Bowels                                                                              | Mental Status                                                                                                                                                                  | Other                                                                               |                                                                                                                                 |                                                                                     |
| <b>Acetaminophen</b>                                                                                                                                                                                                              | <ul style="list-style-type: none"> <li>Widely variable based on amount and time from ingestion; may be symptomatic or only develop nausea, vomiting and abdominal pain early.</li> <li>LFTs may rise after 12 hours after ingestion with few signs or symptoms, peaking 2-3 days later. Severe symptoms: those of liver failure, including coagulopathy and encephalopathy, with renal dysfunction and metabolic disturbances.</li> </ul> | No change                                                                                                                                                                  | No change                                                                            | No change                                                                             | No change                                                                           | <br>(usually after >48 hours in severe cases)                                               | Nausea, vomiting<br>Abdominal pain<br>LFTs, CBC, INR                                | <ul style="list-style-type: none"> <li>Severity dependent; hepatic or renal failure would be evident within 72 hours</li> </ul> |                                                                                     |
| <b>Aspirin (Note: Aspirin has a distinct toxicidrome. Other agents that are NSAIDs (e.g. ibuprofen) are fairly benign in overdose. In massive overdose they may produce drowsiness and metabolic acidosis may rarely be seen)</b> | <ul style="list-style-type: none"> <li><b>Mild-moderate:</b> GI upset, tinnitus, tachypnea</li> <li><b>Severe:</b> Metabolic acidosis, diaphoresis, altered mental status, seizures, coma, pulmonary edema</li> </ul>                                                                                                                                                                                                                     | <br> |  |  | No change or<br>↓                                                                   | <br> | Tinnitus<br>Acid/base abnormality<br>Vomiting<br>Seizures<br>Neuroglycopenia        | <ul style="list-style-type: none"> <li>Dependent on salicylate levels; may need initial monitoring of about 24 hours</li> </ul> |                                                                                     |

| Legend                                                                            |                                                                                                                                                                                                                                                                                                             |                                                                                                                                                                                                                                                                   |                                                                                   |                                                                                    |                                                                                     |                                                                                                                                                                                |                                                                                                         |                                                                                                                                                                                                                                           |                                                                                     |
|-----------------------------------------------------------------------------------|-------------------------------------------------------------------------------------------------------------------------------------------------------------------------------------------------------------------------------------------------------------------------------------------------------------|-------------------------------------------------------------------------------------------------------------------------------------------------------------------------------------------------------------------------------------------------------------------|-----------------------------------------------------------------------------------|------------------------------------------------------------------------------------|-------------------------------------------------------------------------------------|--------------------------------------------------------------------------------------------------------------------------------------------------------------------------------|---------------------------------------------------------------------------------------------------------|-------------------------------------------------------------------------------------------------------------------------------------------------------------------------------------------------------------------------------------------|-------------------------------------------------------------------------------------|
|  |                                                                                                                                                                                                                            |                                                                                                                                                                                  |  |  |  |                                                                                             |                      |                                                                                                                                                        |  |
| HR                                                                                | BP                                                                                                                                                                                                                                                                                                          | ECG changes                                                                                                                                                                                                                                                       | RR                                                                                | ↑temp                                                                              | ↓temp                                                                               | Hyper-active bowel sounds                                                                                                                                                      | Agitation                                                                                               | Confused                                                                                                                                                                                                                                  | Lethargic/somnolent                                                                 |
| Class/Medication                                                                  | Common overdose symptoms                                                                                                                                                                                                                                                                                    | Common Signs, Symptoms, and Monitoring Parameters                                                                                                                                                                                                                 |                                                                                   |                                                                                    |                                                                                     |                                                                                                                                                                                |                                                                                                         | Notes on monitoring duration                                                                                                                                                                                                              |                                                                                     |
|                                                                                   |                                                                                                                                                                                                                                                                                                             | HR/BP                                                                                                                                                                                                                                                             | RR                                                                                | Temp                                                                               | Bowels                                                                              | Mental Status                                                                                                                                                                  | Other                                                                                                   |                                                                                                                                                                                                                                           |                                                                                     |
| <b>Alpha-1 antagonists</b><br>(e.g. prazosin)                                     | <ul style="list-style-type: none"> <li><b>Mild-moderate:</b> hypotension, tachycardia, GI symptoms, mild sedation</li> <li><b>Severe:</b> Hypotension, ECG changes to TdP</li> </ul>                                                                                                                        | <br><br>       | No change                                                                         | No change                                                                          | No change                                                                           | <br>(mild)                                                                                  | Rare: Seizures, agitation, priapism                                                                     | <ul style="list-style-type: none"> <li>Generally 6-12 hours</li> </ul>                                                                                                                                                                    |                                                                                     |
| <b>Alpha-2 agonists</b><br>(e.g. clonidine, guanfacine)                           | <ul style="list-style-type: none"> <li><b>Mild-moderate:</b> CNS depression, bradycardia, QTc prolongation, initial transient hypertension followed by hypotension</li> <li><b>Severe:</b> CNS depression, cardiac events should be anticipated, hypotension which may be delayed and prolonged.</li> </ul> | <br><br> | Variable                                                                          | No change                                                                          | No change or<br>↓                                                                   | <br> | May see initial and transient increases to blood pressure and a delayed hypotension after several hours | <ul style="list-style-type: none"> <li>Onset of symptoms within 30-90 minutes</li> <li>Depends on dosage form 4 hours (IR) to 14 hours (ER)</li> <li>Prolonged presentation possible with extended-release forms (24-72 hours)</li> </ul> |                                                                                     |

| Legend                                                                                                                                                                                          |                                                                                                                                                                                                                                                                                                                |                                                                                                                                                                                                                                                                   |                                                                                   |                                                                                       |                                                                                     |                                                                                                                                                                                                                                                                        |                                                                                                  |                                                                                                                                                                                                                                                                 |                                                                                     |
|-------------------------------------------------------------------------------------------------------------------------------------------------------------------------------------------------|----------------------------------------------------------------------------------------------------------------------------------------------------------------------------------------------------------------------------------------------------------------------------------------------------------------|-------------------------------------------------------------------------------------------------------------------------------------------------------------------------------------------------------------------------------------------------------------------|-----------------------------------------------------------------------------------|---------------------------------------------------------------------------------------|-------------------------------------------------------------------------------------|------------------------------------------------------------------------------------------------------------------------------------------------------------------------------------------------------------------------------------------------------------------------|--------------------------------------------------------------------------------------------------|-----------------------------------------------------------------------------------------------------------------------------------------------------------------------------------------------------------------------------------------------------------------|-------------------------------------------------------------------------------------|
|                                                                                                                |                                                                                                                                                                                                                               |                                                                                                                                                                                  |  |     |  |                                                                                                                                                                                     |               |                                                                                                                                                                              |  |
| HR                                                                                                                                                                                              | BP                                                                                                                                                                                                                                                                                                             | ECG changes                                                                                                                                                                                                                                                       | RR                                                                                | ↑temp                                                                                 | ↓temp                                                                               | Hyper-active bowel sounds                                                                                                                                                                                                                                              | Agitation                                                                                        | Confused                                                                                                                                                                                                                                                        | Lethargic/somnolent                                                                 |
| Class/Medication                                                                                                                                                                                | Common overdose symptoms                                                                                                                                                                                                                                                                                       | Common Signs, Symptoms, and Monitoring Parameters                                                                                                                                                                                                                 |                                                                                   |                                                                                       |                                                                                     |                                                                                                                                                                                                                                                                        |                                                                                                  | Notes on monitoring duration                                                                                                                                                                                                                                    |                                                                                     |
|                                                                                                                                                                                                 |                                                                                                                                                                                                                                                                                                                | HR/BP                                                                                                                                                                                                                                                             | RR                                                                                | Temp                                                                                  | Bowels                                                                              | Mental Status                                                                                                                                                                                                                                                          | Other                                                                                            |                                                                                                                                                                                                                                                                 |                                                                                     |
| <b>Anticholinergic agents</b><br>(e.g. benzotropine, diphenhydramine)                                                                                                                           | <ul style="list-style-type: none"> <li><b>Mild-moderate:</b> Somnolence, anticholinergic, tachycardia, hypertension, GI symptoms, mental status changes</li> <li><b>Severe:</b> Delirium, agitation, psychosis, hallucinations, seizures, hyperthermia, coma, ECG changes</li> </ul>                           | <br><br>       | No change or<br>↑                                                                 |    | ↓                                                                                   | <br>                                                                                             | Hallucination<br>Skin flushing<br>Urinary retention<br>Seizures<br>Gastrointestinal hypomotility | <ul style="list-style-type: none"> <li>Agent and dosage form specific, at least 6 to 8 hours</li> </ul>                                                                                                                                                         |                                                                                     |
| <b>Antipsychotics,</b><br>presentation represents general class effects, presentation may be agent specific (e.g. risperidone, haloperidol, quetiapine, paliperidone, aripiprazole, olanzapine) | <ul style="list-style-type: none"> <li><b>Mild-moderate:</b> Anticholinergic effects, sedation, hypotension mild tachycardia, QTc prolongation</li> <li><b>Severe:</b> CNS depression, anticholinergic poisoning, seizures, tachycardia, hypotension, QTc prolongation, respiratory depression, NMS</li> </ul> | <br><br> | ↓                                                                                 |  | No change or<br>↓                                                                   | <br><br> | Seizures<br>Orthostatic hypotension                                                              | <ul style="list-style-type: none"> <li>Variable based on agent, at least 6-8 hours</li> <li>Monitoring for NMS may be warranted for up to 24-72 hours</li> <li>Do not restart antipsychotics until after 14 days of symptom resolution if NMS occurs</li> </ul> |                                                                                     |

| Legend                                                                            |                                                                                                                                                                                                                                                                                                                                                         |                                                                                     |                                                                                   |                                                                                                                             |                                                                                     |                                                                                                                                                                                                                                                                                                             |                                                                                     |                                                                                                                                                                                   |                                                                                     |
|-----------------------------------------------------------------------------------|---------------------------------------------------------------------------------------------------------------------------------------------------------------------------------------------------------------------------------------------------------------------------------------------------------------------------------------------------------|-------------------------------------------------------------------------------------|-----------------------------------------------------------------------------------|-----------------------------------------------------------------------------------------------------------------------------|-------------------------------------------------------------------------------------|-------------------------------------------------------------------------------------------------------------------------------------------------------------------------------------------------------------------------------------------------------------------------------------------------------------|-------------------------------------------------------------------------------------|-----------------------------------------------------------------------------------------------------------------------------------------------------------------------------------|-------------------------------------------------------------------------------------|
|  |                                                                                                                                                                                                                                                                        |    |  |                                           |  |                                                                                                                                                                                                                          |  |                                                                                                |  |
| HR                                                                                | BP                                                                                                                                                                                                                                                                                                                                                      | ECG changes                                                                         | RR                                                                                | ↑temp                                                                                                                       | ↓temp                                                                               | Hyper-active bowel sounds                                                                                                                                                                                                                                                                                   | Agitation                                                                           | Confused                                                                                                                                                                          | Lethargic/somnolent                                                                 |
| Class/Medication                                                                  | Common overdose symptoms                                                                                                                                                                                                                                                                                                                                | Common Signs, Symptoms, and Monitoring Parameters                                   |                                                                                   |                                                                                                                             |                                                                                     |                                                                                                                                                                                                                                                                                                             |                                                                                     | Notes on monitoring duration                                                                                                                                                      |                                                                                     |
|                                                                                   |                                                                                                                                                                                                                                                                                                                                                         | HR/BP                                                                               | RR                                                                                | Temp                                                                                                                        | Bowels                                                                              | Mental Status                                                                                                                                                                                                                                                                                               | Other                                                                               |                                                                                                                                                                                   |                                                                                     |
| <b>Antihyperglycemics</b>                                                         |                                                                                                                                                                                                                                                                                                                                                         |                                                                                     |                                                                                   |                                                                                                                             |                                                                                     |                                                                                                                                                                                                                                                                                                             |                                                                                     |                                                                                                                                                                                   |                                                                                     |
| Metformin                                                                         | <ul style="list-style-type: none"> <li><b>Mild-moderate:</b> GI symptoms, malaise, and myalgia</li> <li><b>Severe:</b> lactic acidosis, mental status changes, hypotension, and renal failure</li> </ul>                                                                                                                                                | Changes generally only in severe cases                                              | Changes generally only in severe cases                                            | <br>Hypothermia possible in severe cases | No change or ↑                                                                      | Changes generally only in severe cases                                                                                                                                                                                                                                                                      | Glucose monitoring (hypoglycemia unlikely)<br>GI Symptoms<br>Serum creatinine       | <ul style="list-style-type: none"> <li>Dosage form specific, at least 8-12 hours</li> </ul>                                                                                       |                                                                                     |
| Sulfonylureas                                                                     | <ul style="list-style-type: none"> <li><b>Mild-moderate:</b> More directly affects glucose and toxicity is usually secondary to hypoglycemia</li> <li><b>Severe:</b> CNS symptoms resulting from hypoglycemia including seizures, altered mental status, delirium, focal neurologic effects, and coma may result. Potential for dysrhythmias</li> </ul> |  | Changes generally only in severe cases                                            | No change                                                                                                                   | No change                                                                           | <br><br><br>Usually secondary to hypoglycemia | Glucose monitoring                                                                  | <ul style="list-style-type: none"> <li>Agent and dosage form specific, at least 18 hours (IR) to 24 hours (ER)</li> <li>Hypoglycemia may be present for up to 72 hours</li> </ul> |                                                                                     |

| Legend                                                                            |                                                                                                                                                                                                                                                                                                                                               |                                                                                                                                                                                                                                                                   |                                                                                    |                                                                                     |                                                                                     |                                                                                                                                                                                |                                                                                     |                                                                                                                                   |                                                                                     |
|-----------------------------------------------------------------------------------|-----------------------------------------------------------------------------------------------------------------------------------------------------------------------------------------------------------------------------------------------------------------------------------------------------------------------------------------------|-------------------------------------------------------------------------------------------------------------------------------------------------------------------------------------------------------------------------------------------------------------------|------------------------------------------------------------------------------------|-------------------------------------------------------------------------------------|-------------------------------------------------------------------------------------|--------------------------------------------------------------------------------------------------------------------------------------------------------------------------------|-------------------------------------------------------------------------------------|-----------------------------------------------------------------------------------------------------------------------------------|-------------------------------------------------------------------------------------|
|  |                                                                                                                                                                                                                                                              |                                                                                                                                                                                  |   |   |  |                                                                                             |  |                                                |  |
| HR                                                                                | BP                                                                                                                                                                                                                                                                                                                                            | ECG changes                                                                                                                                                                                                                                                       | RR                                                                                 | ↑temp                                                                               | ↓temp                                                                               | Hyper-active bowel sounds                                                                                                                                                      | Agitation                                                                           | Confused                                                                                                                          | Lethargic/somnolent                                                                 |
| Class/Medication                                                                  | Common overdose symptoms                                                                                                                                                                                                                                                                                                                      | Common Signs, Symptoms, and Monitoring Parameters                                                                                                                                                                                                                 |                                                                                    |                                                                                     |                                                                                     |                                                                                                                                                                                |                                                                                     | Notes on monitoring duration                                                                                                      |                                                                                     |
|                                                                                   |                                                                                                                                                                                                                                                                                                                                               | HR/BP                                                                                                                                                                                                                                                             | RR                                                                                 | Temp                                                                                | Bowels                                                                              | Mental Status                                                                                                                                                                  | Other                                                                               |                                                                                                                                   |                                                                                     |
| <b>Benzodiazepines</b> (e.g. lorazepam, clonazepam, diazepam, alprazolam)         | <ul style="list-style-type: none"> <li><b>Mild-moderate:</b> CNS/respiratory depression (note: Coingestion of other CNS depressants including alcohol increases risk of effects dramatically)</li> <li><b>Severe:</b> Respiratory depression/arrest. Effects are variable based on specific agent and occurrence of a co-ingestion</li> </ul> | <br><br>       |  |  | ↓ or ∅                                                                              | <br>     | Ataxia<br>Hyporeflexia                                                              | <ul style="list-style-type: none"> <li>Agent specific, monitoring for as long as CNS/respiratory depression is evident</li> </ul> |                                                                                     |
| <b>Beta-blockers</b> (e.g. propranolol, metoprolol, atenolol)                     | <ul style="list-style-type: none"> <li><b>Mild-moderate:</b> bradycardia, hypotension</li> <li><b>Severe:</b> ECG change/conduction delays, hypotension, renal failure, coma and cardiopulmonary arrest, bronchospasm. Propranolol easily crosses the into the CNS and may cause more sedation/seizures</li> </ul>                            | <br><br> | Dyspnea, bronchospasm (especially with history of asthma/COPD)                     | No change                                                                           | No change                                                                           | <br> | Hypoglycemia<br>Seizures<br>CNS depression                                          | <ul style="list-style-type: none"> <li>Agent and dosage form specific, at least 6 hours or longer with ER products</li> </ul>     |                                                                                     |

| Legend                                                                                  |                                                                                                                                                                                                                                                                                                                                                                                    |                                                                                                                                                                                                                                                                   |                                                                                                             |                                                                                    |                                                                                     |                                                                                       |                                                                                                                                                                                                                                                                         |                                                                                              |                                                                                                                                                                                                                                       |
|-----------------------------------------------------------------------------------------|------------------------------------------------------------------------------------------------------------------------------------------------------------------------------------------------------------------------------------------------------------------------------------------------------------------------------------------------------------------------------------|-------------------------------------------------------------------------------------------------------------------------------------------------------------------------------------------------------------------------------------------------------------------|-------------------------------------------------------------------------------------------------------------|------------------------------------------------------------------------------------|-------------------------------------------------------------------------------------|---------------------------------------------------------------------------------------|-------------------------------------------------------------------------------------------------------------------------------------------------------------------------------------------------------------------------------------------------------------------------|----------------------------------------------------------------------------------------------|---------------------------------------------------------------------------------------------------------------------------------------------------------------------------------------------------------------------------------------|
|        |                                                                                                                                                                                                                                                                                                   |                                                                                                                                                                                  |                            |  |  |    |                                                                                                                                                                                      |           |                                                                                                                                                    |
| HR                                                                                      | BP                                                                                                                                                                                                                                                                                                                                                                                 | ECG changes                                                                                                                                                                                                                                                       | RR                                                                                                          | ↑temp                                                                              | ↓temp                                                                               | Hyper-active bowel sounds                                                             | Agitation                                                                                                                                                                                                                                                               | Confused                                                                                     | Lethargic/somnolent                                                                                                                                                                                                                   |
| Class/Medication                                                                        | Common overdose symptoms                                                                                                                                                                                                                                                                                                                                                           | Common Signs, Symptoms, and Monitoring Parameters                                                                                                                                                                                                                 |                                                                                                             |                                                                                    |                                                                                     |                                                                                       |                                                                                                                                                                                                                                                                         | Notes on monitoring duration                                                                 |                                                                                                                                                                                                                                       |
|                                                                                         |                                                                                                                                                                                                                                                                                                                                                                                    | HR/BP                                                                                                                                                                                                                                                             | RR                                                                                                          | Temp                                                                               | Bowels                                                                              | Mental Status                                                                         | Other                                                                                                                                                                                                                                                                   |                                                                                              |                                                                                                                                                                                                                                       |
| Mood Stabilizers (Carbamazepine, divalproex sodium/valproic acid, lamotrigine, lithium) |                                                                                                                                                                                                                                                                                                                                                                                    |                                                                                                                                                                                                                                                                   |                                                                                                             |                                                                                    |                                                                                     |                                                                                       |                                                                                                                                                                                                                                                                         |                                                                                              |                                                                                                                                                                                                                                       |
| Carbamazepine                                                                           | <ul style="list-style-type: none"> <li><b>Mild-moderate:</b> nystagmus, ataxia, hyperreflexia, CNS depression, dystonia, tachycardia, tremor anticholinergic effects</li> <li><b>Severe:</b> coma, seizures, respiratory depression, renal failure, cardiac toxicity, hyponatremia rhabdomyolysis, hepatotoxicity</li> </ul>                                                       | <br><br>       | Depends on severity<br>   | No change                                                                          | ↓                                                                                   |                                                                                       | <br><br>       | LFTs, CBC, electrolytes<br>Anticholinergic effects<br>Seizure<br>Rash<br>Motor symptoms/gait | <ul style="list-style-type: none"> <li>Dosage form specific, minimum of 12 hours (IR) or up to 96 hours (ER)</li> <li>Unpredictable absorption, can check serum levels to ensure declining concentrations</li> </ul>                  |
| Divalproex sodium, valproic acid                                                        | <ul style="list-style-type: none"> <li><b>Mild-moderate:</b> lethargy/sedation, mental status changes, GI symptoms, hyperammonemia, transaminitis, tremor</li> <li><b>Severe:</b> CNS/respiratory depression, ECG changes, tachycardia, hypotension, hypernatremia, hepatotoxicity, hyperammonemia</li> <li><b>Other:</b> Delayed bone marrow suppression, pancreatitis</li> </ul> | <br><br> | Depends on severity<br> | No change                                                                          |                                                                                     |  | <br><br> | LFTs, CBC, electrolytes<br>Nausea, vomiting, diarrhea<br>Motor symptoms/gait                 | <ul style="list-style-type: none"> <li>Dosage form specific, at least 6 hours (IR) or at least 12-24 hours (ER) or longer if symptomatic</li> <li>Valproic acid levels can be monitored to ensure declining concentrations</li> </ul> |

| Legend                                                                            |                                                                                                                                                                                                                                                                                                                                                                                                                                                                                                                           |                                                                                                                                                                                                                                                                   |                                                                                                           |                                                                                    |                                                                                       |                                                                                                                                                                                                                                                                         |                                                                                                                                    |                                                                                                                                                                                              |                                                                                     |
|-----------------------------------------------------------------------------------|---------------------------------------------------------------------------------------------------------------------------------------------------------------------------------------------------------------------------------------------------------------------------------------------------------------------------------------------------------------------------------------------------------------------------------------------------------------------------------------------------------------------------|-------------------------------------------------------------------------------------------------------------------------------------------------------------------------------------------------------------------------------------------------------------------|-----------------------------------------------------------------------------------------------------------|------------------------------------------------------------------------------------|---------------------------------------------------------------------------------------|-------------------------------------------------------------------------------------------------------------------------------------------------------------------------------------------------------------------------------------------------------------------------|------------------------------------------------------------------------------------------------------------------------------------|----------------------------------------------------------------------------------------------------------------------------------------------------------------------------------------------|-------------------------------------------------------------------------------------|
|  |                                                                                                                                                                                                                                                                                                                                                                                                                                          |                                                                                                                                                                                  |                          |  |    |                                                                                                                                                                                      |                                                 |                                                                                                           |  |
| HR                                                                                | BP                                                                                                                                                                                                                                                                                                                                                                                                                                                                                                                        | ECG changes                                                                                                                                                                                                                                                       | RR                                                                                                        | ↑temp                                                                              | ↓temp                                                                                 | Hyper-active bowel sounds                                                                                                                                                                                                                                               | Agitation                                                                                                                          | Confused                                                                                                                                                                                     | Lethargic/somnolent                                                                 |
| Class/Medication                                                                  | Common overdose symptoms                                                                                                                                                                                                                                                                                                                                                                                                                                                                                                  | Common Signs, Symptoms, and Monitoring Parameters                                                                                                                                                                                                                 |                                                                                                           |                                                                                    |                                                                                       |                                                                                                                                                                                                                                                                         |                                                                                                                                    | Notes on monitoring duration                                                                                                                                                                 |                                                                                     |
|                                                                                   |                                                                                                                                                                                                                                                                                                                                                                                                                                                                                                                           | HR/BP                                                                                                                                                                                                                                                             | RR                                                                                                        | Temp                                                                               | Bowels                                                                                | Mental Status                                                                                                                                                                                                                                                           | Other                                                                                                                              |                                                                                                                                                                                              |                                                                                     |
| Lamotrigine                                                                       | <ul style="list-style-type: none"> <li><b>Mild-moderate:</b> GI ADEs, CNS depression, tremor, xerostomia, vision changes, gait changes, transaminitis</li> <li><b>Severe:</b> ECG changes, electrolyte abnormalities, oculo-gyric crisis, seizures, rhabdomyolysis, coma encephalopathy, and respiratory depression</li> <li><b>Other:</b> seizure, hypersensitivity reactions that may be delayed (3-5 weeks)</li> </ul>                                                                                                 | Variable<br>                                                                                                                                                                     | Depends on severity<br> | No change                                                                          | No change                                                                             | <br><br>       | LFTs, CBC<br><br>Motor symptoms/gait<br><br>Rash                                                                                   | <ul style="list-style-type: none"> <li>Dosage form specific, at least 6-8 hours (IR) or up to 12-24 hours (ER)</li> </ul>                                                                    |                                                                                     |
| Lithium                                                                           | <ul style="list-style-type: none"> <li><b>Mild-moderate:</b> Nausea, vomiting, diarrhea, CNS depression, mental status changes, tremor, AKI, serotonergic toxicities, ECG changes (bradycardia, T-wave abnormalities)</li> <li><b>Severe:</b> electrolyte abnormalities, acute kidney injury, seizure, hyperthermia, coma, rigidity, myoclonus, serotonin syndrome. severe ECG changes, hypotension</li> <li><b>Other:</b> sustained effects possible: cerebellar and cognitive dysfunction, EPS-like symptoms</li> </ul> | <br><br> | No change                                                                                                 | No change                                                                          |  | <br><br> | Serum creatinine, electrolytes<br><br>Nausea, vomiting, diarrhea<br><br>Motor symptoms/gait<br><br>Serotonin like picture possible | <ul style="list-style-type: none"> <li>Dosage form specific; at least 6 hours (IR) or up to 12 hours (ER)</li> <li>Initial serum levels may not correlate well in acute ingestion</li> </ul> |                                                                                     |

| Legend                                                                                                                                                                                                                                                                                                                         |                                                                                                                                                                                                                                                                                                                                                                         |                                                                                                                                                                                                                                                                  |                                                                                                                 |                                                                                       |                                                                                       |                                                                                       |                                                                                     |                                                                                                                                                                                                                                      |                                                                                     |
|--------------------------------------------------------------------------------------------------------------------------------------------------------------------------------------------------------------------------------------------------------------------------------------------------------------------------------|-------------------------------------------------------------------------------------------------------------------------------------------------------------------------------------------------------------------------------------------------------------------------------------------------------------------------------------------------------------------------|------------------------------------------------------------------------------------------------------------------------------------------------------------------------------------------------------------------------------------------------------------------|-----------------------------------------------------------------------------------------------------------------|---------------------------------------------------------------------------------------|---------------------------------------------------------------------------------------|---------------------------------------------------------------------------------------|-------------------------------------------------------------------------------------|--------------------------------------------------------------------------------------------------------------------------------------------------------------------------------------------------------------------------------------|-------------------------------------------------------------------------------------|
|                                                                                                                                                                                                                                               |                                                                                                                                                                                                                                                                                        |                                                                                                                                                                                 |                                |     |    |    |  |                                                                                                                                                   |  |
| HR                                                                                                                                                                                                                                                                                                                             | BP                                                                                                                                                                                                                                                                                                                                                                      | ECG changes                                                                                                                                                                                                                                                      | RR                                                                                                              | ↑temp                                                                                 | ↓temp                                                                                 | Hyper-active bowel sounds                                                             | Agitation                                                                           | Confused                                                                                                                                                                                                                             | Lethargic/somnolent                                                                 |
| Class/Medication                                                                                                                                                                                                                                                                                                               | Common overdose symptoms                                                                                                                                                                                                                                                                                                                                                | Common Signs, Symptoms, and Monitoring Parameters                                                                                                                                                                                                                |                                                                                                                 |                                                                                       |                                                                                       |                                                                                       |                                                                                     | Notes on monitoring duration                                                                                                                                                                                                         |                                                                                     |
|                                                                                                                                                                                                                                                                                                                                |                                                                                                                                                                                                                                                                                                                                                                         | HR/BP                                                                                                                                                                                                                                                            | RR                                                                                                              | Temp                                                                                  | Bowels                                                                                | Mental Status                                                                         | Other                                                                               |                                                                                                                                                                                                                                      |                                                                                     |
| <b>Opioids</b>                                                                                                                                                                                                                                                                                                                 | <ul style="list-style-type: none"> <li><b>Mild-moderate:</b> Euphoria, drowsiness, constipation, nausea, vomiting, miosis, mild bradycardia, mild hypotension</li> <li><b>Severe:</b> Respiratory depression, hypoxia, coma, bradycardia, prolonged QT, or acute lung injury. Potential for serotonergic effects (especially tramadol, fentanyl, meperidine)</li> </ul> | <br><br>      |                               |    |    |    | Pulmonary edema<br><br>Seizures (with some agents)<br><br>Rare: serotonin syndrome  | 4-6 hours unless: <ul style="list-style-type: none"> <li>ER formulation (12 hours)</li> <li>Buprenorphine or fentanyl patch (6 to 12 hours)</li> <li>Buprenorphine (12 hours)</li> </ul>                                             |                                                                                     |
| <b>Serotonergic agents</b><br>Antidepressants (e.g., SSRI, SNRI, TCA), opioid pain medications, various OTCs (e.g. dextromethorphan, St. John's Wort), list not inclusive<br><b>(Note bupropion is distinct in that it is more likely associated with seizures, agitation, hallucinations, tachycardia, mild hypertension)</b> | <ul style="list-style-type: none"> <li><b>Mild-moderate:</b> Somnolence, dizziness, agitation, GI symptoms, tachycardia, palpitations, hypertension, elevated LTFs, and cutaneous vasodilation.</li> <li><b>Severe:</b> CNS depression. serotonin syndrome (clonus, hyperreflexia, altered mental status, or hemodynamic instability), seizures</li> </ul>              | <br><br> | Depends on severity<br><br> |  |  |  | Clonus, muscle rigidity, hyperreflexia<br><br>Serum creatinine, creatinine kinase   | <ul style="list-style-type: none"> <li>Presentation within hours</li> <li>Resolution in mild-moderate case within 24 to 48 hours.</li> <li>Do not restart serotonergic agents until after complete resolution of symptoms</li> </ul> |                                                                                     |



| Legend                                                                            |                                                                                                                                                                                                                                                |                                                                                                                                                                                                                                                             |                                                                                    |                                                                                     |                                                                                     |                                                                                     |                                                                                     |                                                                                                                                                                                              |                                                                                     |
|-----------------------------------------------------------------------------------|------------------------------------------------------------------------------------------------------------------------------------------------------------------------------------------------------------------------------------------------|-------------------------------------------------------------------------------------------------------------------------------------------------------------------------------------------------------------------------------------------------------------|------------------------------------------------------------------------------------|-------------------------------------------------------------------------------------|-------------------------------------------------------------------------------------|-------------------------------------------------------------------------------------|-------------------------------------------------------------------------------------|----------------------------------------------------------------------------------------------------------------------------------------------------------------------------------------------|-------------------------------------------------------------------------------------|
|  |                                                                                                                                                               |                                                                                                                                                                            |   |   |  |  |  |                                                                                                           |  |
| HR                                                                                | BP                                                                                                                                                                                                                                             | ECG changes                                                                                                                                                                                                                                                 | RR                                                                                 | ↑temp                                                                               | ↓temp                                                                               | Hyper-active bowel sounds                                                           | Agitation                                                                           | Confused                                                                                                                                                                                     | Lethargic/somnolent                                                                 |
| Class/Medication                                                                  | Common overdose symptoms                                                                                                                                                                                                                       | Common Signs, Symptoms, and Monitoring Parameters                                                                                                                                                                                                           |                                                                                    |                                                                                     |                                                                                     |                                                                                     |                                                                                     | Notes on monitoring duration                                                                                                                                                                 |                                                                                     |
|                                                                                   |                                                                                                                                                                                                                                                | HR/BP                                                                                                                                                                                                                                                       | RR                                                                                 | Temp                                                                                | Bowels                                                                              | Mental Status                                                                       | Other                                                                               |                                                                                                                                                                                              |                                                                                     |
| <b>Sympathomimetic/stimulants</b>                                                 | <ul style="list-style-type: none"> <li><b>Mild-moderate:</b> tachycardia, hypertension, restlessness, agitation</li> <li><b>Severe:</b> ECG changes, arrhythmias, hypertensive crisis, psychosis, hyperreflexia, serotonin syndrome</li> </ul> | <br><br> |  |  |  |  | Tremors<br>Skin flushing, sweating<br>Hyperactivity<br>Seizures                     | <ul style="list-style-type: none"> <li>Dosage form specific, at least 6-8 hours (IR) or up to 12-24 hours (ER)</li> <li>Many dosage forms exist with differing release mechanisms</li> </ul> |                                                                                     |

\*Content adapted from MN Poison Control guidelines, Hoffman R.S., & Howland M, & Lewin N.A., & Nelson L.S., & Goldfrank L.R.(Eds.), (2015). Goldfrank's Toxicologic Emergencies, 10e. McGraw Hill.

\*\*Table used with permission of Mayo Foundation for Medical Education and Research

Abbreviations: ADE = adverse drug events, AKI = acute kidney injury, BP = blood pressure, CBC = complete blood count, COPD = chronic obstructive pulmonary disease, CNS = central nervous system, ECG = electrocardiogram, EPS = extrapyramidal symptoms, ER = extended release, GI = gastrointestinal, HR = heart rate, INR = international normalized ratio, IR = immediate release, LFTs = liver function tests, NMS = neuroleptic malignant syndrome, NSAIDs = non-steroidal anti-inflammatory drugs, OTC = over the counter medications, RR = respiratory rate, SNRI = serotonin and norepinephrine reuptake inhibitor, SSRI = selective serotonin reuptake inhibitor, TCA = tricyclic antidepressant, TdP = torsade de pointes, temp = temperature

Comments:

- Symptom and timing presentation may be variable based acute, acute-on-chronic, or chronic toxicity
- Note medication history and formulations that are delayed/extended-release product; reports exist of symptoms presenting as late as 24+ hours.
- Pharmacobezoars are the result of solid dosage forms conglomerating. They are rare but can significantly alter/delay/prolong presentation
- Always consider unknown co-ingestions
